# Supplementary material for: Cross-Linked Polyimide/ZIF-8 Mixed-Matrix Membranes by In Situ Formation of ZIF-8: Effect of Cross-Linking on Their Propylene/Propane Separation
Source: MDPI journal article supplement (doi:10.3390/membranes12100964), 2022-10-01
Supplement: s1 [file s1]

## Supporting Information

# Cross-Linked Polyimide/ZIF-8 Mixed-Matrix Membranes by In Situ Formation of ZIF-8: Effect of Cross-Linking on Their Propylene/Propane Separation

Sunghwan Park <sup>1,2,\*</sup> and Hae-Kwon Jeong <sup>3,4,\*</sup>

<sup>1</sup> School of Energy Materials & Chemical Engineering, Kyungpook National University, Sangju-si 37224, Republic of Korea

<sup>2</sup> Department of Advanced Science and Technology Convergence, Kyungpook National University, Sangju-si 37224, Republic of Korea

<sup>3</sup> Artie McFerrin Department of Chemical Engineering, Texas A&M University, 3122 TAMU, College Station, TX 77843-3122, USA

<sup>4</sup> Department of Materials Science and Engineering, Texas A&M University, 3122 TAMU, College Station, TX 77843-3122, USA

\* Correspondence: sunghwan@knu.ac.kr (S.P.); hjeong7@tamu.edu (H.-K.J.); Tel.: +82-54-530-1331 (S.P.); +1-979-862-4850 (H.-K.J.); Fax: +1-979-845-6446 (H.-K.J.)

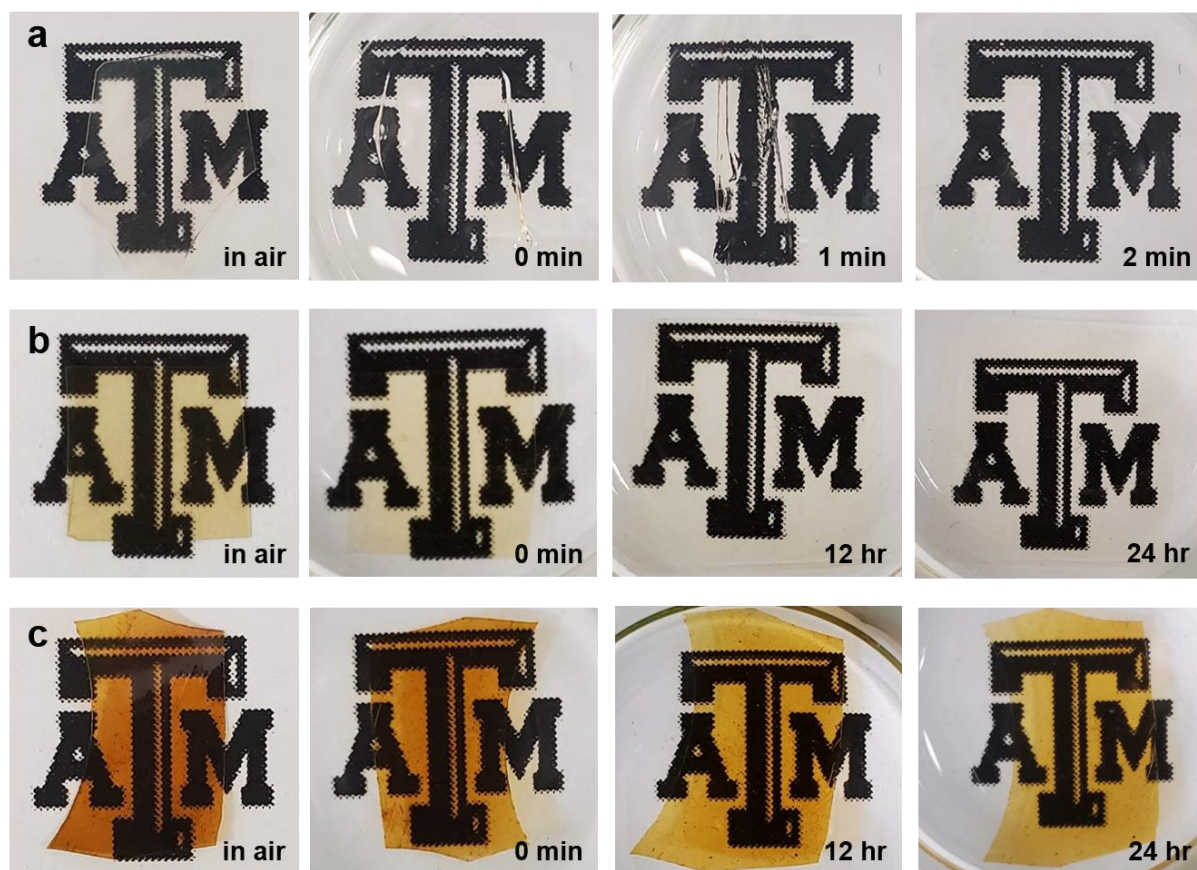

**Figure S1.** Photographs of (a) PI, (b) X-PI(370), and (c) X-PI(420) in air and DMF for different times.

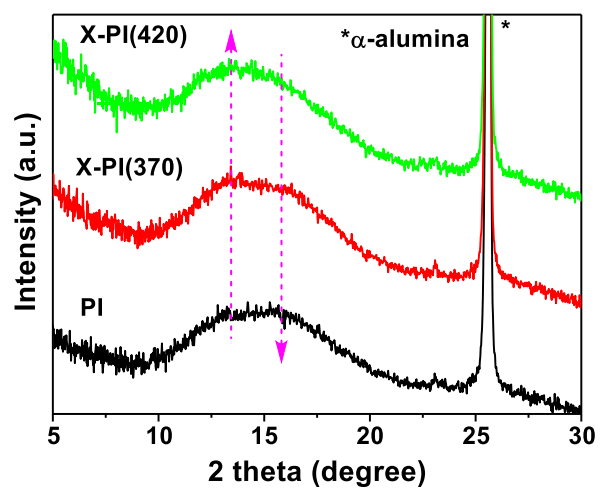

**Figure S2.** XRD patterns of PI and two X-PIs coated on  $\alpha$ -alumina supports that were cross-linked under different conditions.

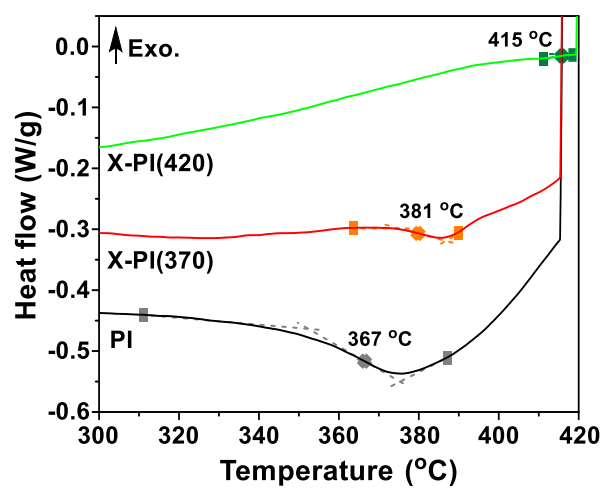

**Figure S3.** Differential scanning calorimetric (DSC) thermogram of PI and two X-PIs.

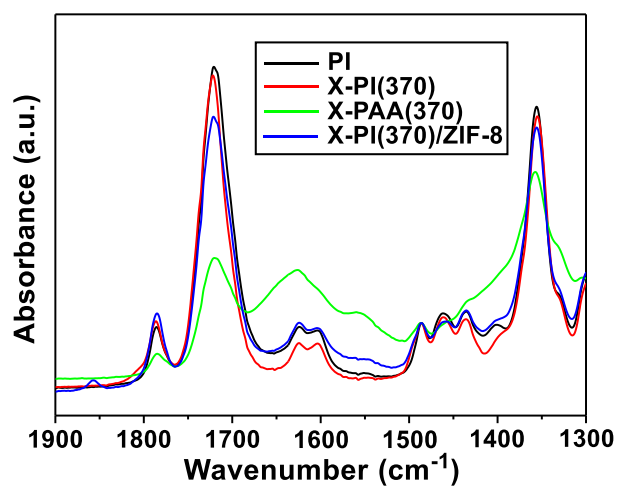

**Figure S4.** FT-IR spectra of X-PI(370), X-PAA(370), and X-PI(370)/ZIF-8 in comparison with neat PI.

**Table S1.** Loading percentages of ZIF-8 *in-situ* formed in cross-linked polymers.

| Sample          | Zinc concentration in ion exchange solution |                    |                    |
|-----------------|---------------------------------------------|--------------------|--------------------|
|                 | 0.5 M                                       | 1.0 M              | 1.5 M              |
| X-PI(370)/ZIF-8 | $7.6 \pm 1.9$ wt%                           | $14.9 \pm 3.3$ wt% | $19.7 \pm 2.8$ wt% |
| X-PI(420)/ZIF-8 | $2.8 \pm 1.0$ wt%                           | $4.8 \pm 0.8$ wt%  | $6.2 \pm 1.7$ wt%  |

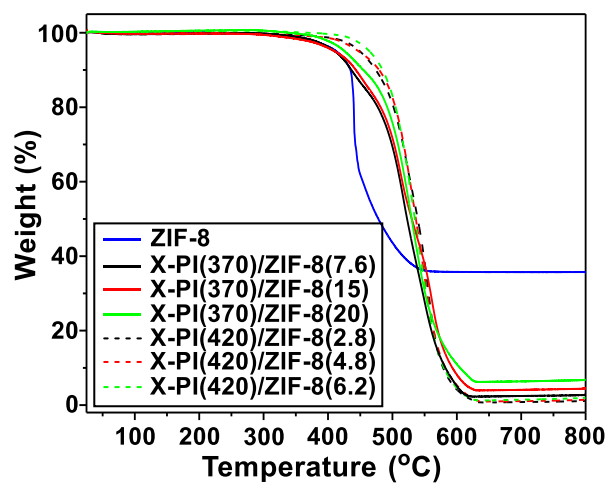

**Figure S5.** TGA thermogram of ZIF-8 and MMMs under air flow. The numbers in the parentheses are the ZIF-8 loadings.

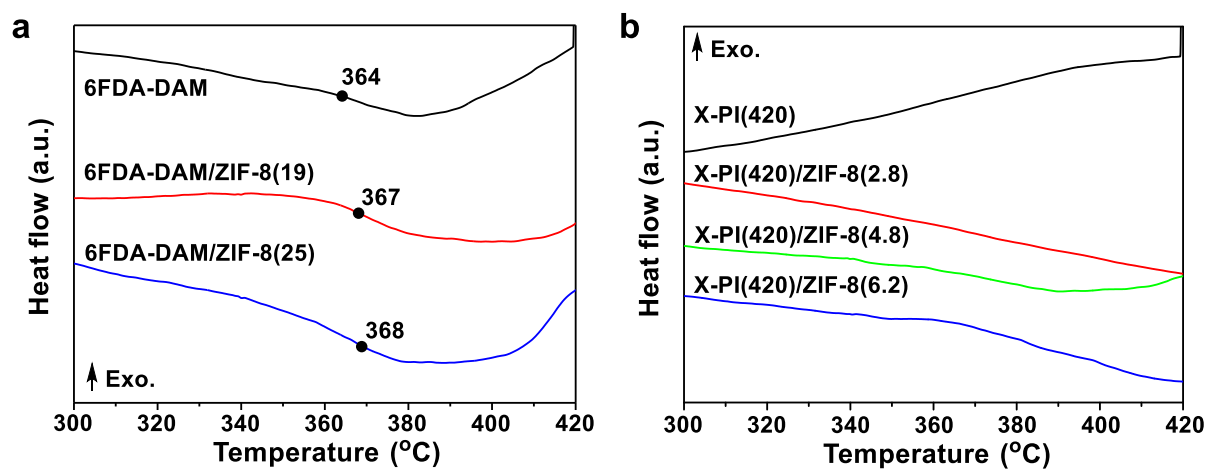

**Figure S6.** DSC thermograms of (a) 6FDA-DAM and (b) X-PI(420) and their MMMs with different ZIF-8 loadings.



**Table S2.** Summary of binary (50/50) C<sub>3</sub>H<sub>6</sub>/C<sub>3</sub>H<sub>8</sub> separation performances of polymer membranes and MMMs at ~ 1 atm and room temperature.

| Sample          | ZIF-8 loading (wt%) | C <sub>3</sub> H <sub>6</sub> permeability<br>(Barrer) | C <sub>3</sub> H <sub>6</sub> /C <sub>3</sub> H <sub>8</sub> separation<br>factor |
|-----------------|---------------------|--------------------------------------------------------|-----------------------------------------------------------------------------------|
| PI              | -                   | 1.51 ± 0.34                                            | 23.9 ± 4.4                                                                        |
| X-PI(370)       | -                   | 3.06 ± 0.98                                            | 17.7 ± 0.6                                                                        |
| X-PI(370)/ZIF-8 | 7.6                 | 2.87 ± 0.51                                            | 26.9 ± 4.1                                                                        |
|                 | 14.9                | 2.32 ± 0.58                                            | 42.7 ± 2.1                                                                        |
|                 | 19.7                | 1.30 ± 0.04                                            | 32.0 ± 1.2                                                                        |
| X-PI(420)       | -                   | 8.91 ± 1.48                                            | 15.2 ± 0.7                                                                        |
| X-PI(420)/ZIF-8 | 2.8                 | 4.71 ± 0.01                                            | 22.0 ± 5.0                                                                        |
|                 | 4.8                 | 3.23 ± 0.08                                            | 28.8 ± 2.7                                                                        |
|                 | 6.2                 | 2.59 ± 0.15                                            | 32.5 ± 6.9                                                                        |

**Table S3.** Comparison of relative physical properties of X-PI(370), X-PI(420), 6FDA-DAM, and PIM-1.

| Polymer   | Free volume | Chain rigidity <sup>b</sup> | Degree of swelling |
|-----------|-------------|-----------------------------|--------------------|
| X-PI(370) | Low         | Moderate                    | High               |
| X-PI(420) | Moderate    | High                        | Low                |
| 6FDA-DAM  | High        | Moderate                    | High               |
| PIM-1     | Very high   | Very high                   | Low                |

<sup>a</sup> The free volumes were evaluated based on intrinsic gas permeabilities. <sup>b</sup> The chain rigidities were estimated by  $T_{gs}$  determined by DSC curves.
